# Supplementary material for: Field-Level Evaluation of Honey Bee Exposure and Risk from Pesticides Used in Maize Production
Source: Research Square preprint supplement (doi:10.21203/rs.3.rs-8384368/v1), 2025-12-18
Supplement: Supplementary file 1 [file 16079dbd5fdcafea8c1a55f7.docx]

**Electronic Supplementary Material**

Field-Level Evaluation of Honey Bee Exposure and Risk from Pesticides Used in Maize Production

Zeliha Şimşek1, Melis Yalçın1, Mustafa Kösoğlu2, Nalan Turgut3, Cafer Turgut1*

1Faculty of Agriculture, Aydın Adnan Menderes University, Aydın, Türkiye

2Apiculture Research Center, Aegean Agricultural Research Institute, Izmir 35661, Türkiye

3Agroquatro A.S. Bornova/İzmir, Türkiye

**Corresponding Author: Cafer Turgut*

*Corresponding author’s e-mail:* [cturgut@adu.edu.tr](mailto:cturgut@adu.edu.tr)

1Orcid ID: [0000-0002-6450-5361](https://orcid.org/0000-0002-6450-5361)

Table S1. Active ingredients, application rates, pesticide group, and commercial products used for maize seed treatment

| **No** | Active Ingredient | **Dosage** | **Pesticide Group** | **Trade Name** | **Company** |
| --- | --- | --- | --- | --- | --- |
| **1** | Cyantraniliprole | 500 ml per 100 kg seed | **Insecticide** | Fortenza 600 FS | **Syngenta** |
| **2** | Thiamethoxam | 1000 ml per 100 kg seed | **Insecticide** | **Cruiser 600 FS** | **Syngenta** |
| **3** | Fludioxonil + Metalaxyl-M | 300 ml per 100 kg seed | **Fungicide** | Maxim XL 035 FS | **Syngenta** |
| **4** | Untreated (Control) |  |  |  |  |

Table S2: The values of limit of detection (LOD), limit of quantification (LOQ) and recoveries

| Pesticide | LOD (µg/kg) | LOQ (µg/kg) | Recovery (%) |
| --- | --- | --- | --- |
| Fludioxonil | 1.24 | 3.42 | 85-91 |
| Metalaxyl M | 0.12 | 1.56 | 91-97 |
| Cyantraniliprole | 0.92 | 2.82 | 82-96 |
| Thiamethoxam | 0.88 | 2.93 | 87-91 |
